# Supplementary material
Source: PubMed Central journal article supplement (PMC4251089)
Supplement: Supp_Figure2.pdf [file Supp_Figure2.pdf]

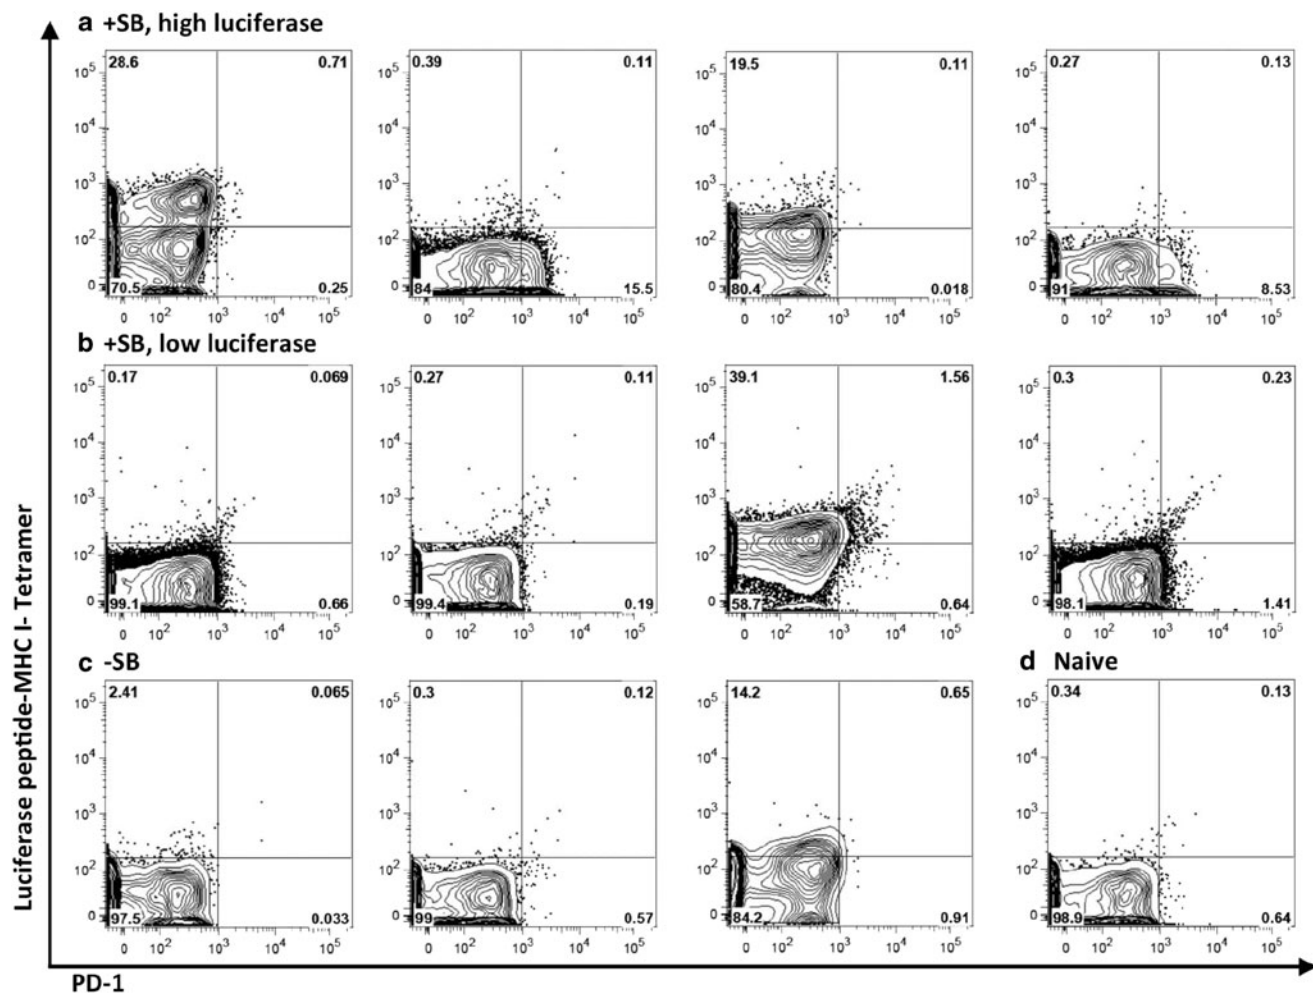

**SUPPLEMENTARY FIG. S2.** Flow analysis of MHC I-luciferase peptide tetramer binding of CD8+ PD-1+ T cells. CD8+ T cells from the same mice shown in Supplementary Fig. S1 plotted here for MHC I-luciferase peptide tetramer binding versus PD-1.
